# Supplementary material
Source: PubMed Central journal article supplement (PMC6990840)
Supplement: jamainternmed-180-263-s002.pdf [file jamainternmed-180-263-s002.pdf]

## Supplementary Online Content

Luyt C-E, Forel J-M, Hajage D, et al. Acyclovir for mechanically ventilated patients with herpes simplex virus oropharyngeal reactivation: a randomized clinical trial. *JAMA Intern Med*. Published online December 16, 2019. doi:10.1001/jamainternmed.2019.5713

**eTable 1.** Microorganisms Responsible for Bacteremia/Fungemia Post-Randomization According to Study Group

**eTable 2.** Ventilator-Free Days and Mortality at Day 60 According to Subgroup Analysis

**eTable 3.** Ventilator-Free Days and Day-60 Mortality According to Time of Randomization

**eTable 4.** Adverse Events

**eTable 5.** Percentages of Patients Receiving Renal Replacement Therapy According to Study Group From Randomization to Day 21

**eFigure 1.** Time to Weaning Off Mechanical Ventilation According to Study Group

**eFigure 2.** Temperature Kinetics from Randomization to Day 14 According to Study Group

**eFigure 3.** White Blood-Cell-Count Kinetics from Randomization to Day 14 According to Study Group

**eFigure 4.** Kinetics of Radiologic Score1 from Randomization to Day 14 According to Study Group

**eFigure 5.** Evolution of Modified Clinical Pulmonary Infection Score (mCPIS) From Randomization to Day 14 According to Study Group

**eFigure 6.** Kinetics of the Sequential Organ-Failure Assessment (SOFA) Score From Randomization to Day 28 According to Study Group

**eFigure 7.** Evolution of PaO<sub>2</sub>/FiO<sub>2</sub> Ratio from Randomization to Day 28 According to Study Group

**eFigure 8.** Subgroup Analyses of Day 60 Mortality

**eFigure 9.** Sensitivity Analysis Comparing the Cumulative Incidence of Each Event; Weaning of Mechanical Ventilation and Death

**eFigure 10.** Kaplan–Meier 90-Day Survival Estimates for the Intention-To-Treat Population

**eFigure 11.** Creatinine-Level Kinetics from Randomization to Day 28 According to Study Group

**eFigure 12.** Glasgow Coma Score Kinetics from Randomization to Day 14 According to Study Group

**eFigure 13.** Bilirubin-Level Kinetics from Randomization to Day 28 According to Study Group

**eFigure 14.** Platelet-Count Kinetics from Randomization to Day 28 According to Study Group

**eReferences.**

This supplementary material has been provided by the authors to give readers additional information about their work.

**eTable 1. Microorganisms Responsible for Bacteremia/Fungemia Post-Randomization According to Study Group.**

| <b>Parameter</b>                    | <b>Acyclovir group<br/>(N=119)</b> | <b>Placebo group<br/>(N=119)</b> |
|-------------------------------------|------------------------------------|----------------------------------|
| Bacteremia                          | 38 (32)                            | 47 (39)                          |
| Enterobacteriaceae                  | 9 (8)                              | 17 (14)                          |
| <i>Pseudomonas aeruginosa</i>       | 7 (6)                              | 5 (4)                            |
| <i>Stenotrophomonas maltophilia</i> | 3 (3)                              | 3 (3)                            |
| <i>Acinetobacter</i> spp.           | 2 (2)                              | 0                                |
| <i>Enterococcus</i> spp.            | 8 (7)                              | 5 (4)                            |
| Coagulase-negative staphylococci    | 6 (5)                              | 10 (8)                           |
| <i>Staphylococcus aureus</i>        | 1 (1)                              | 1 (1)                            |
| Other cocci                         | 2 (2)                              | 6 (5)                            |
| Fungemia                            | 5 (4)                              | 5 (4)                            |
| <i>Candida</i> spp.                 | 5 (100)                            | 3 (60)                           |
| Other                               | 0                                  | 2 (40)                           |

Results are expressed as No. (%).

**eTable 2. Ventilator-Free Days and Mortality at Day 60 According to Subgroup Analysis.**

| <b>Outcome</b>                               | <b>Acyclovir group</b> | <b>Placebo group</b> | <b>P value</b> |
|----------------------------------------------|------------------------|----------------------|----------------|
| Ventilator-free days at day 60, median (IQR) |                        |                      |                |
| According to number of organ failures; no.   |                        |                      | .09*           |
| <2 organ failures at randomization; 114      | 49 (30–56); 57         | 44 (0–53); 57        | .04            |
| ≥2 organ failures at randomization; 124      | 13 (0–43); 62          | 12 (0–45); 62        | .9             |
| According to MV duration; no.                |                        |                      | .67            |
| MV pre-randomization ≤10 days; 130           | 36 (0–53); 70          | 40 (0–50); 60        | .5             |
| MV pre-randomization >10 days; 108           | 35 (0–51); 49          | 31 (0–49); 59        | .2             |
| Day-60 mortality, no. (%)                    |                        |                      |                |
| According to number of organ failures; no.   |                        |                      | .03*           |
| <2 organ failure at randomization; 114       | 5/57 (9)               | 17/57 (30)           | .004           |
| ≥2 organ failure at randomization; 124       | 21/62 (34)             | 22/62 (35)           | .8             |
| According to MV duration; no.                |                        |                      | .5             |
| MV pre-randomization ≤10 days; 130           | 16/70 (23)             | 18/60 (30)           | .4             |
| MV pre-randomization >10 days; 108           | 10/49 (20)             | 21/59 (36)           | .08            |

MV denotes mechanical ventilation, IQR interquartile range.

\* P value for interaction

**eTable 3. Ventilator-Free Days and Day-60 Mortality According to Time of Randomization**

| <b>Outcome</b>                                | <b>Acyclovir group</b> | <b>Placebo group</b> | <b>P value</b> |
|-----------------------------------------------|------------------------|----------------------|----------------|
| Ventilator-free days at day 60, median (IQR)  |                        |                      |                |
| According to time of randomization; no.       |                        |                      | .43*           |
| Patients randomized before November 2016; 206 | 37 (0-52)              | 37 (0-51)            | .35            |
| Patients randomized after November 2016; 32   | 29 (0-53)              | 0 (0-42)             | .20            |
| Day-60 mortality, n (%)                       |                        |                      |                |
| According to time of randomization; no.       |                        |                      | .67*           |
| Patients randomized before November 2016: 206 | 23 (22)                | 33 (32)              | .12            |
| Patients randomized after November 2016; 32   | 3 (19)                 | 6 (38)               | .43            |

IQR denotes interquartile range

\* P value for interaction

**eTable 4. Adverse Events.**

| <b>Adverse event</b>                                        | <b>Acyclovir group<br/>(N=119)</b> | <b>Placebo group<br/>(N=119)</b> |
|-------------------------------------------------------------|------------------------------------|----------------------------------|
| Patients with at least 1 serious adverse event <sup>a</sup> | 33 (28)                            | 27 (23)                          |
| Infection                                                   | 21 (18)                            | 15 (13)                          |
| Acute renal failure                                         | 3 (3)                              | 2 (2)                            |
| Skin rash                                                   | 3 (3)                              | 0                                |
| Cardiac arrest                                              | 2 (2)                              | 0                                |
| Ischemic stroke                                             | 1 (1)                              | 4 (3)                            |
| Intracranial hemorrhage                                     | 0                                  | 1 (1)                            |
| Cardiogenic shock                                           | 7 (6)                              | 3 (3)                            |
| Hemorrhagic shock                                           | 3 (3)                              | 1 (1)                            |
| Hepatic cytolysis                                           | 2 (2)                              | 0                                |
| Gastrointestinal bleeding                                   | 2 (2)                              | 2 (2)                            |
| Myocardial infarction                                       | 1 (1)                              | 0                                |
| Herpes zoster infection                                     | 0                                  | 1 (1)                            |
| Pneumothorax                                                | 0                                  | 1 (1)                            |
| ICU re-admission after discharge                            | 1 (1)                              | 1 (1)                            |
| Miscellaneous                                               | 6 (5)                              | 11 (9)                           |

Results are expressed as No. (%).

ICU denotes intensive care unit.

<sup>a</sup>  $P=.4$  for between-group comparison.

**eTable 5. Percentages of Patients Receiving Renal Replacement Therapy According to Study Group from Randomization to Day 21.**

| <b>Study group</b> | <b>Randomization</b> | <b>Day 3</b> | <b>Day 7</b> | <b>Day 14</b> | <b>Day 21</b> |
|--------------------|----------------------|--------------|--------------|---------------|---------------|
| Acyclovir, no. (%) | 36/119 (30)          | 28/119 (24)  | 22/115 (19)  | 21/110 (19)   | 14/104 (13)   |
| Placebo, no. (%)   | 29/119 (24)          | 28/118 (24)  | 22/111 (20)  | 20/100 (20)   | 7/89 (8)      |

**eFigure 1. Time to Weaning off Mechanical Ventilation According to Study Group.**

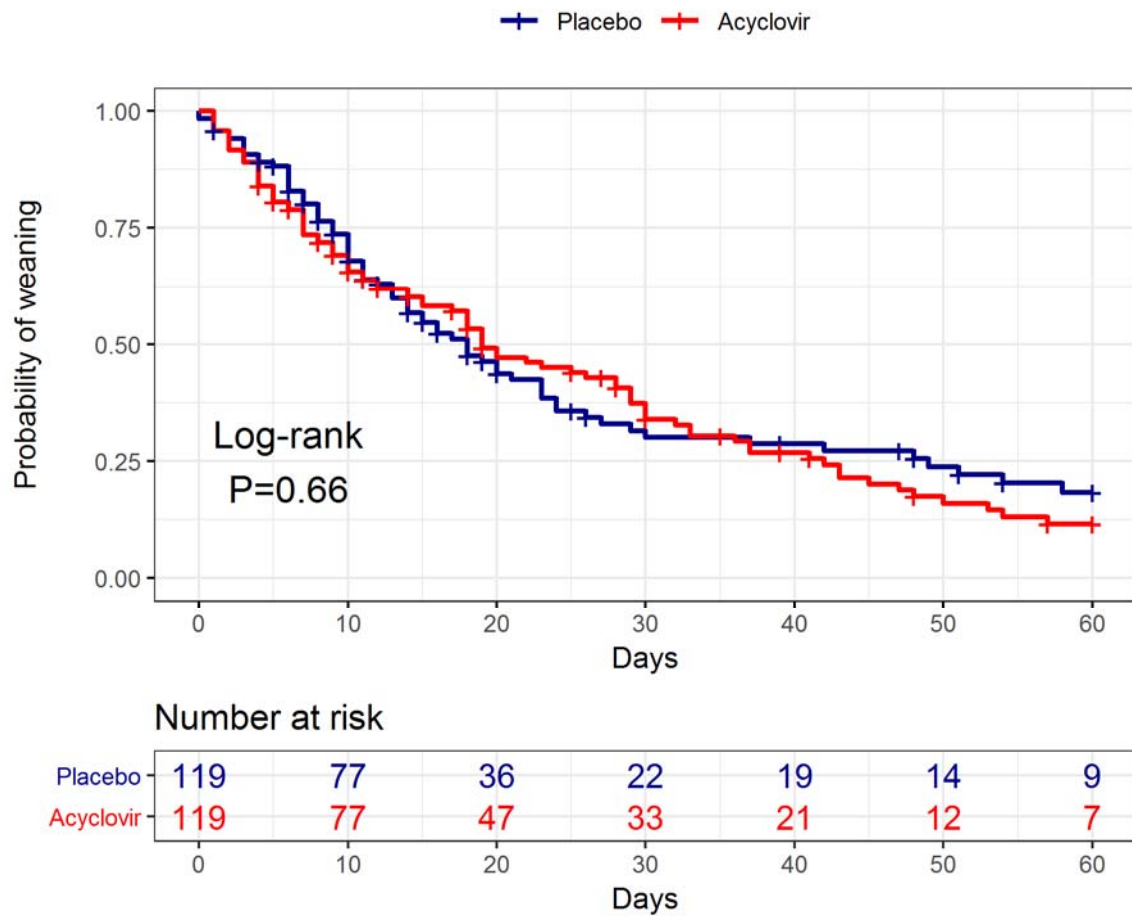

eFigure 2. Temperature Kinetics from Randomization to Day 14 According to Study Group.

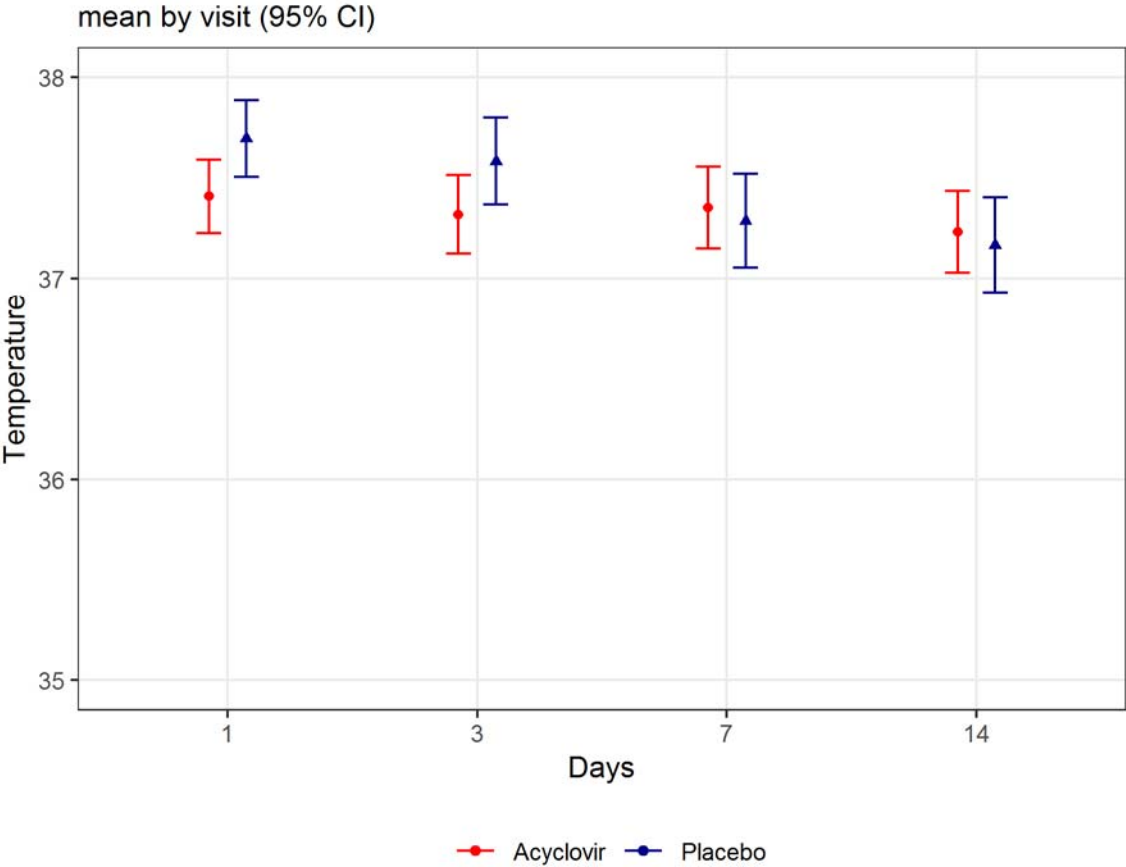



**eFigure 3. White Blood-Cell-Count Kinetics from Randomization to Day 14 according to Study Group.**

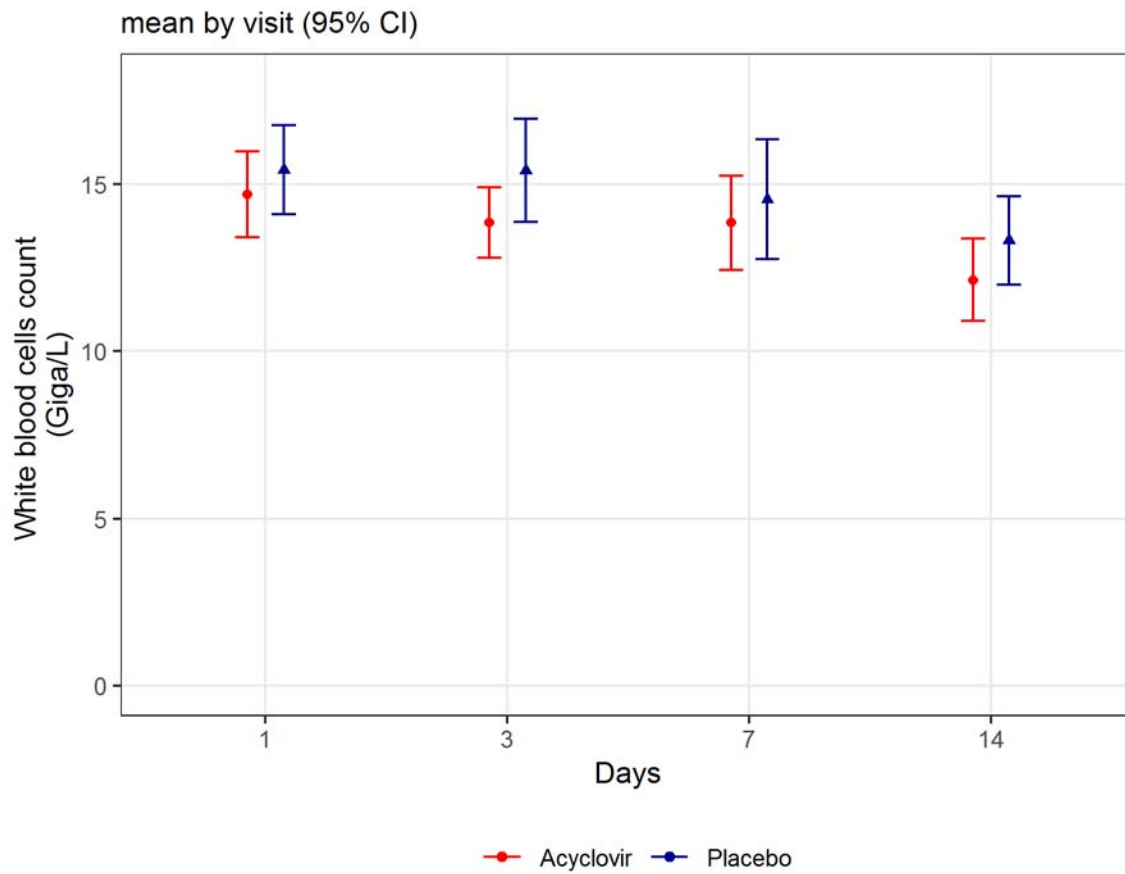

**eFigure 4. Kinetics of Radiologic Score<sup>1</sup> from Randomization to Day 14 According to Study Group.**

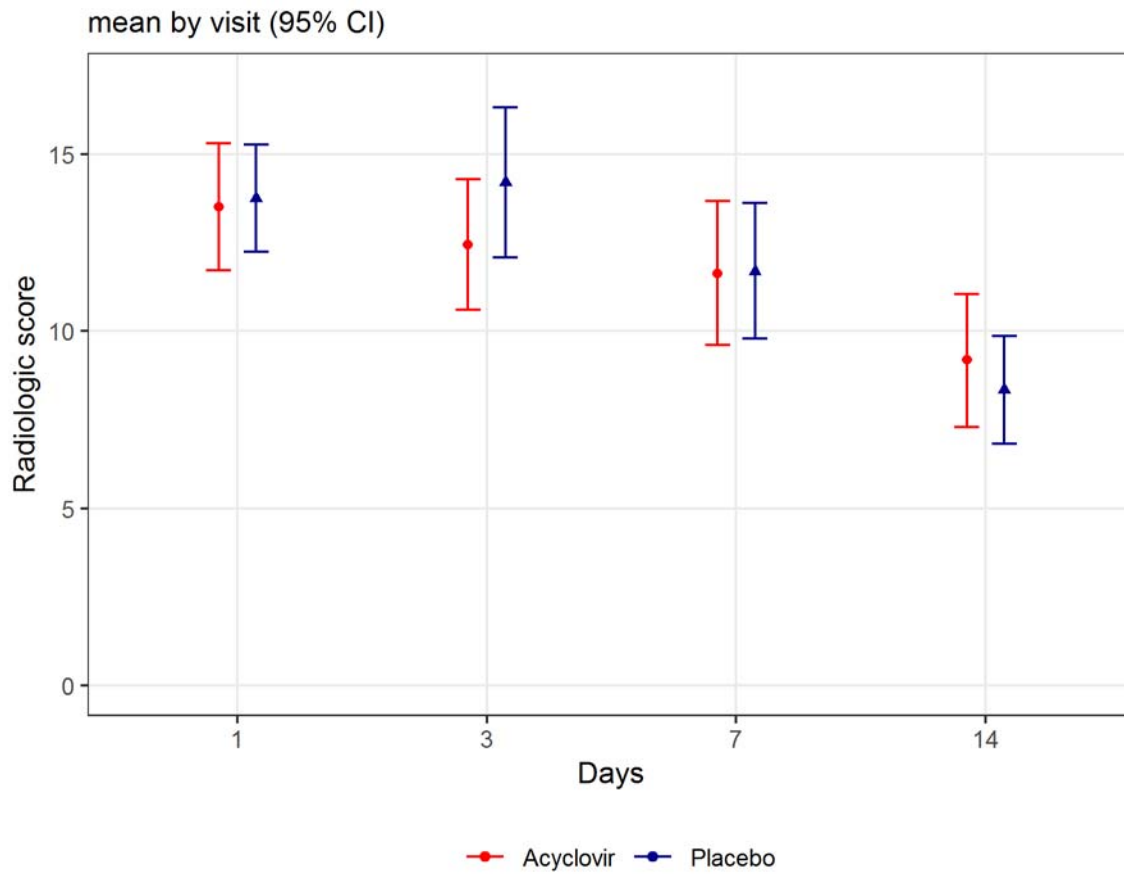

**eFigure 5. Evolution of Modified Clinical Pulmonary Infection Score (mCPIS)<sup>2</sup> from Randomization to Day 14 According to Study Group.**

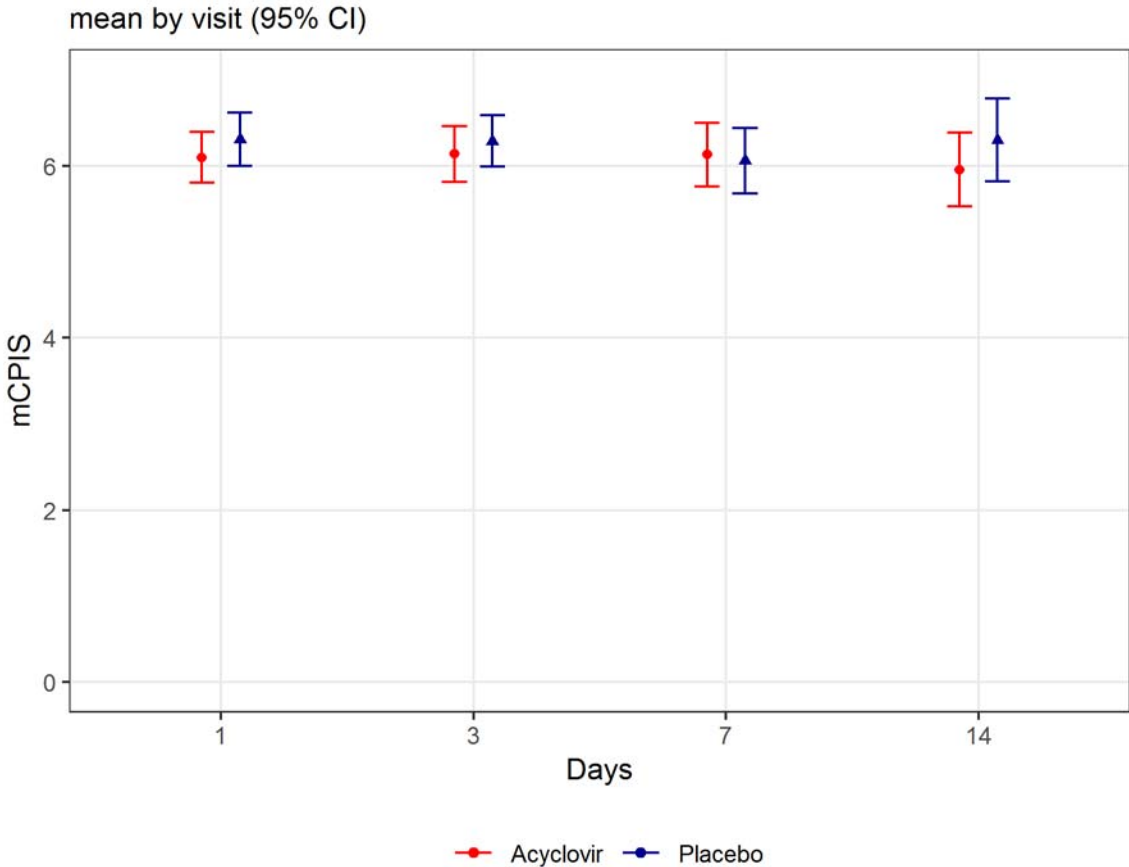

**eFigure 6. Kinetics of the Sequential Organ-Failure Assessment (SOFA)<sup>3</sup> Score from Randomization to Day 28 According to Study Group.**

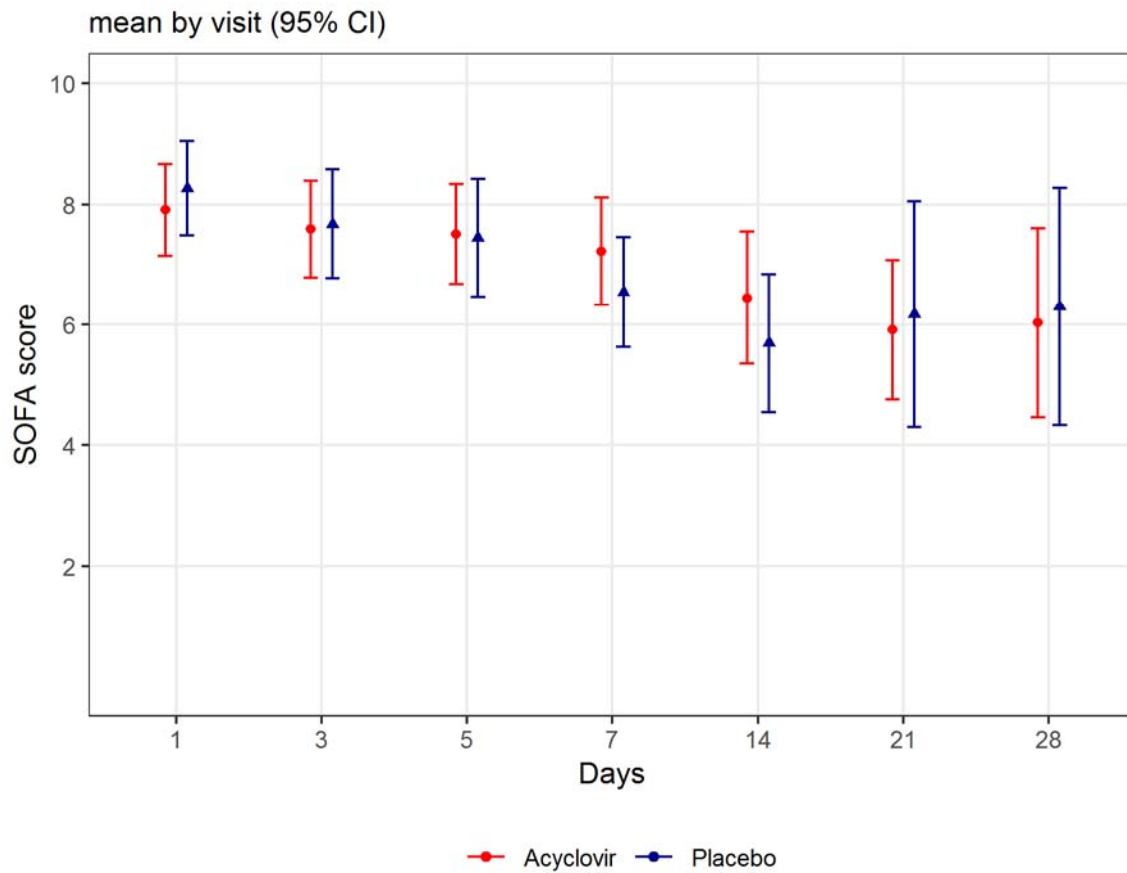

**eFigure 7. Evolution of PaO<sub>2</sub>/FiO<sub>2</sub> Ratio from Randomization to Day 28 According to Study Group.**

PaO<sub>2</sub>/FiO<sub>2</sub> denotes partial oxygen pressure in arterial blood/fraction of inspired oxygen ratio.

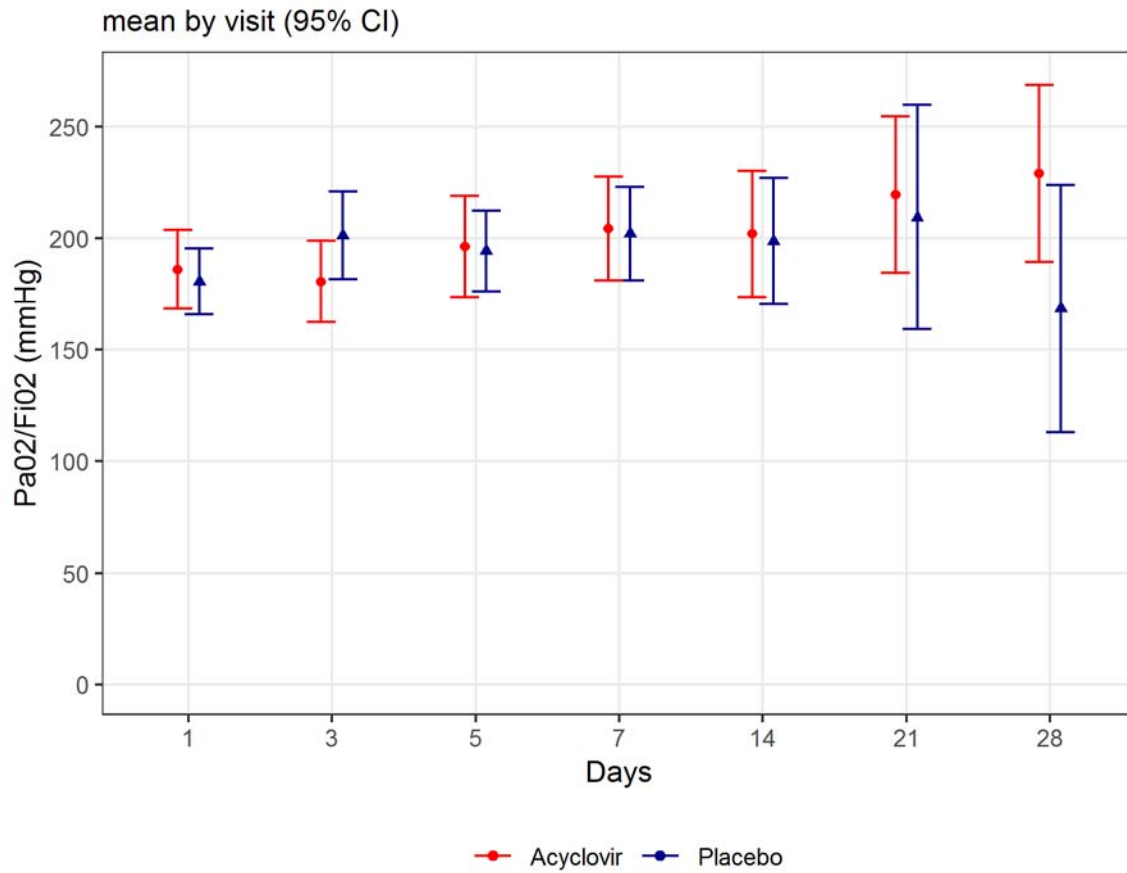

**eFigure 8. Subgroup Analyses of Day 60 Mortality.**

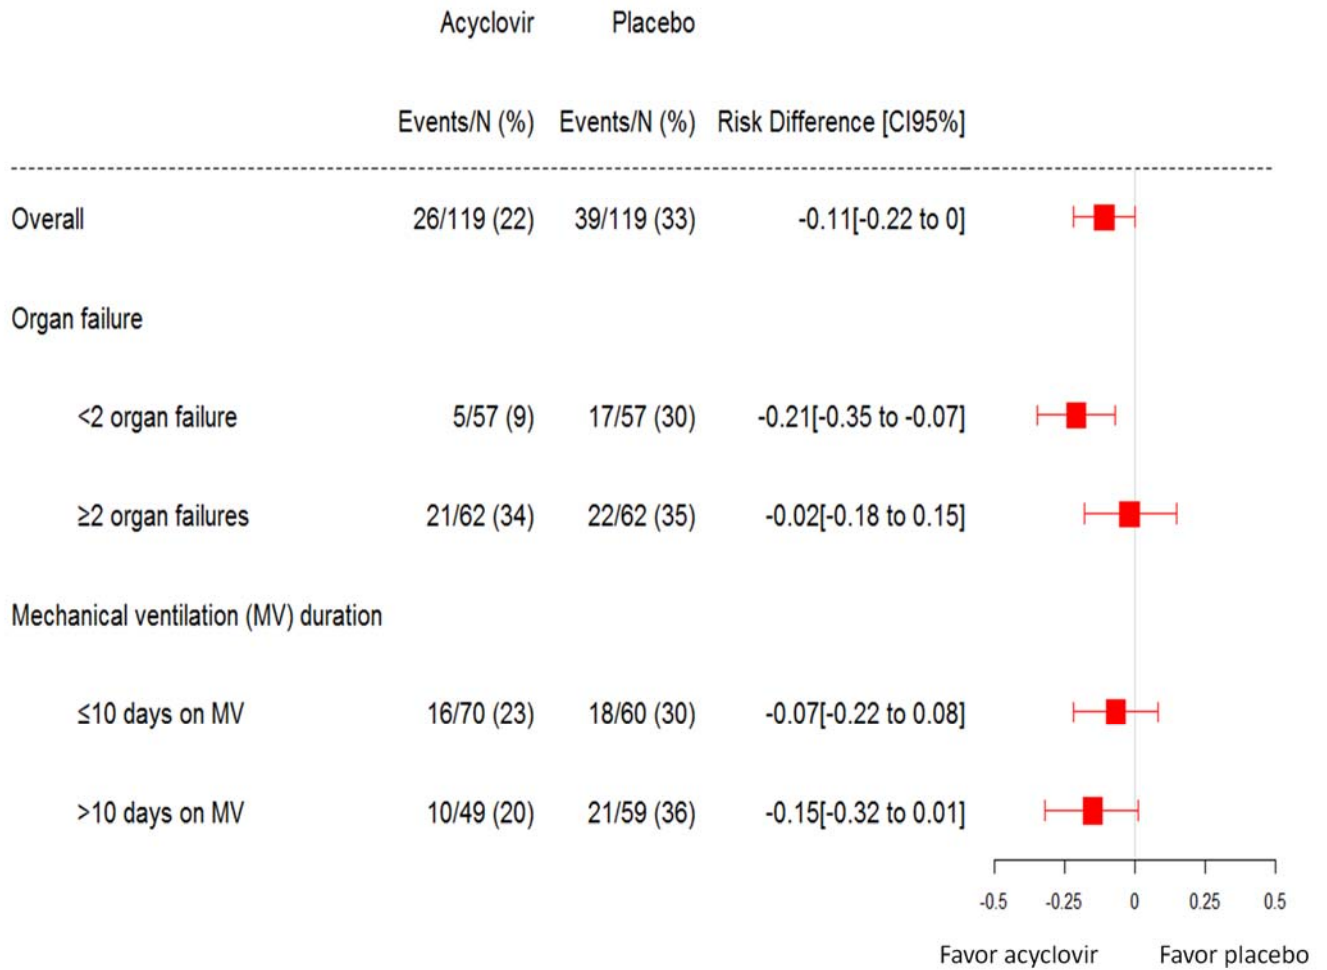

**eFigure 9. Sensitivity Analysis Comparing the Cumulative Incidence of Each Event; Weaning of Mechanical Ventilation and Death**

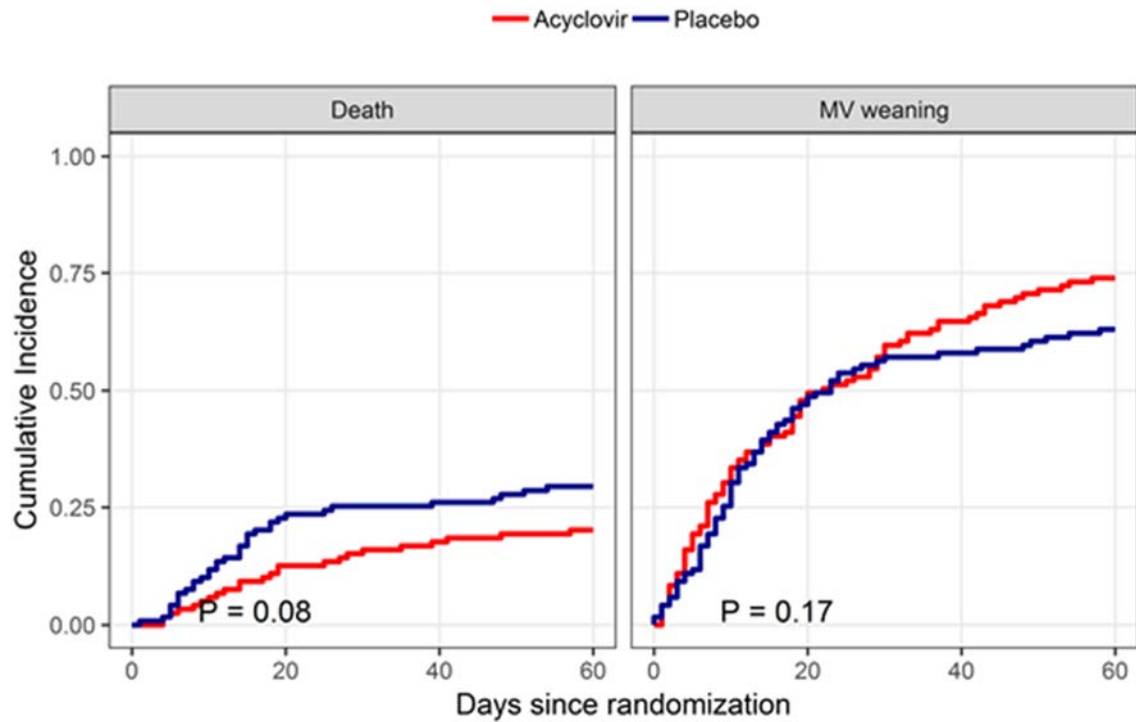

**eFigure 10. Kaplan–Meier 90-Day Survival Estimates for the Intention-To-Treat Population.**

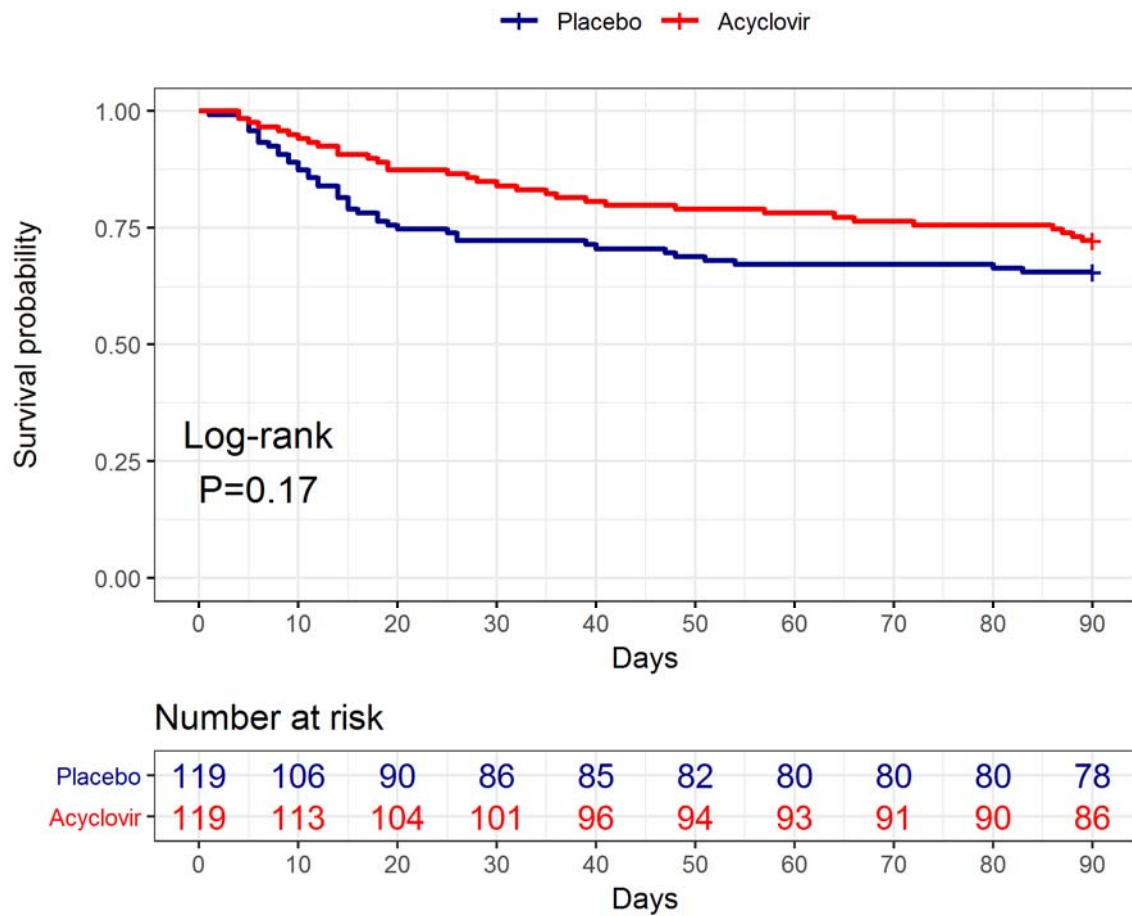



**eFigure 11. Creatinine-Level Kinetics from Randomization to Day 28 According to Study Group.**

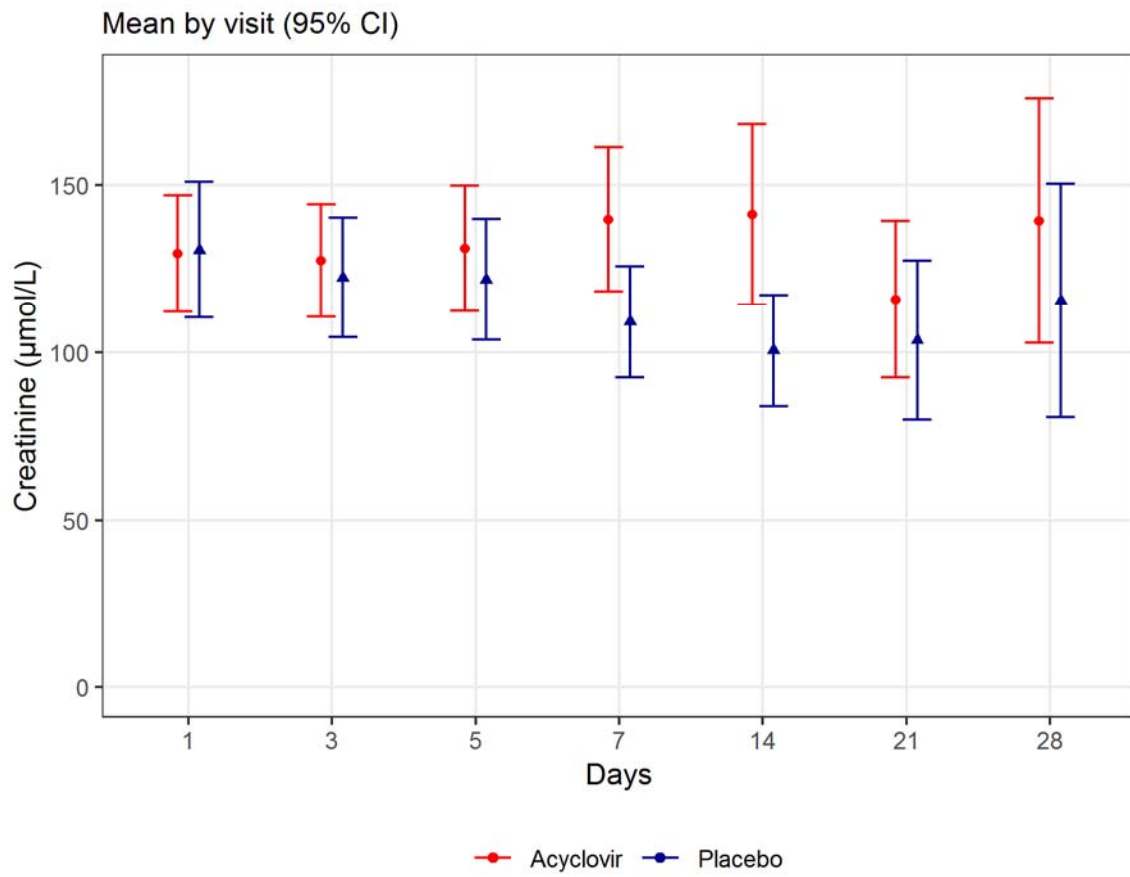

**eFigure 12. Glasgow Coma Score Kinetics from Randomization to Day 14 According to Study Group.**

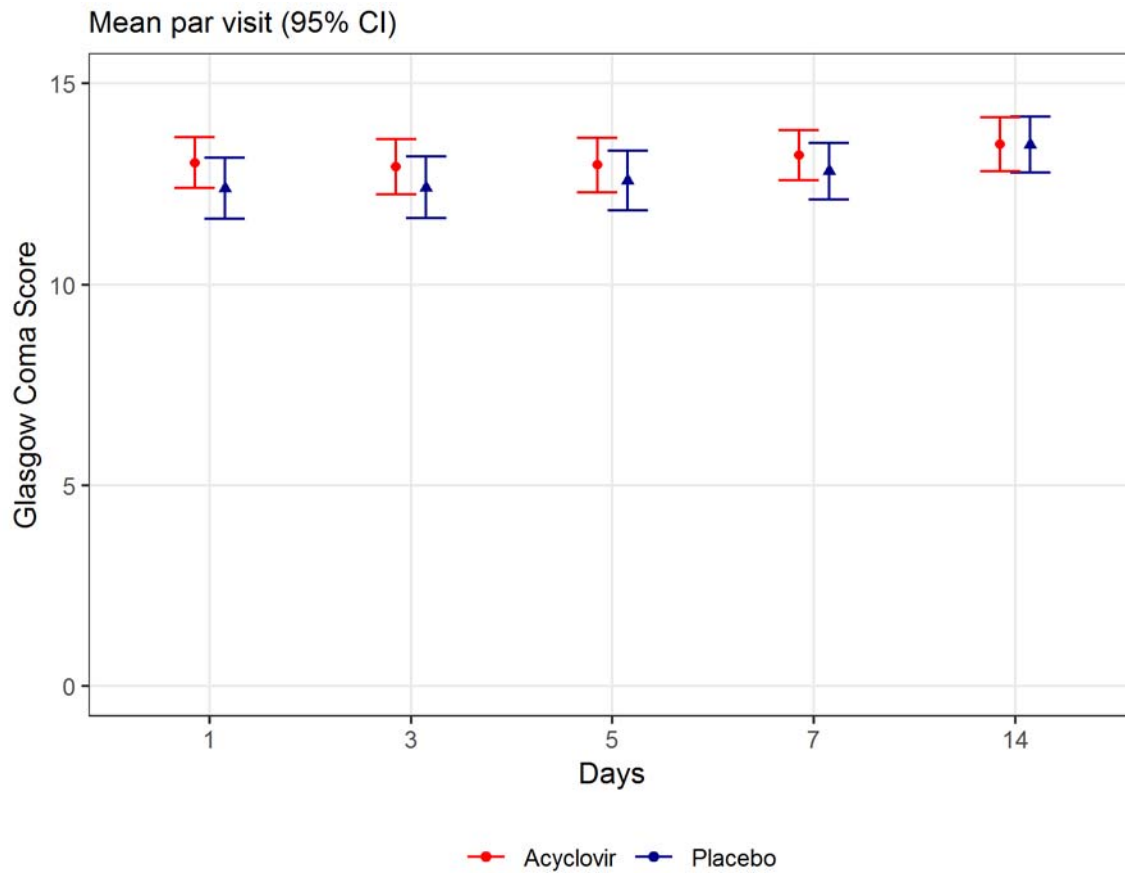

**eFigure 13. Bilirubin-Level Kinetics from Randomization to Day 28 According to Study Group.**

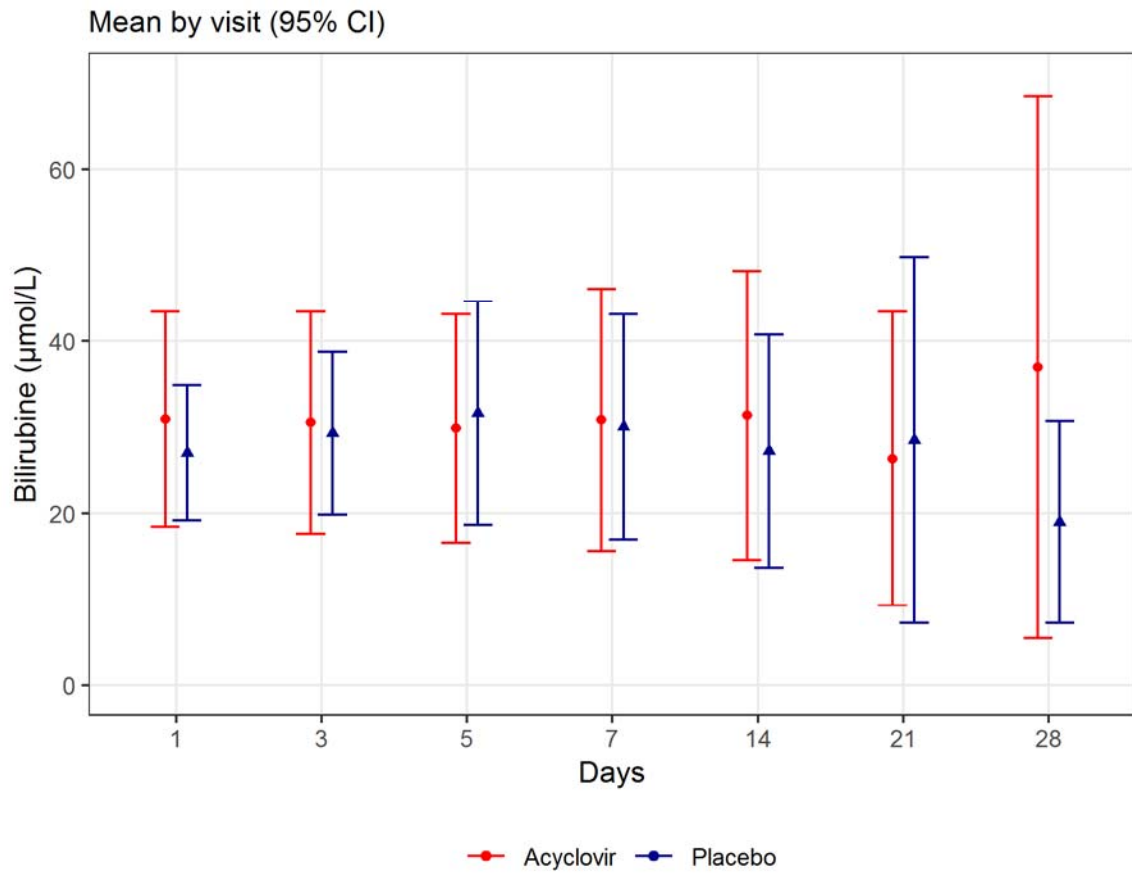

**eFigure 14. Platelet-Count Kinetics from Randomization to Day 28 According to Study Group.**

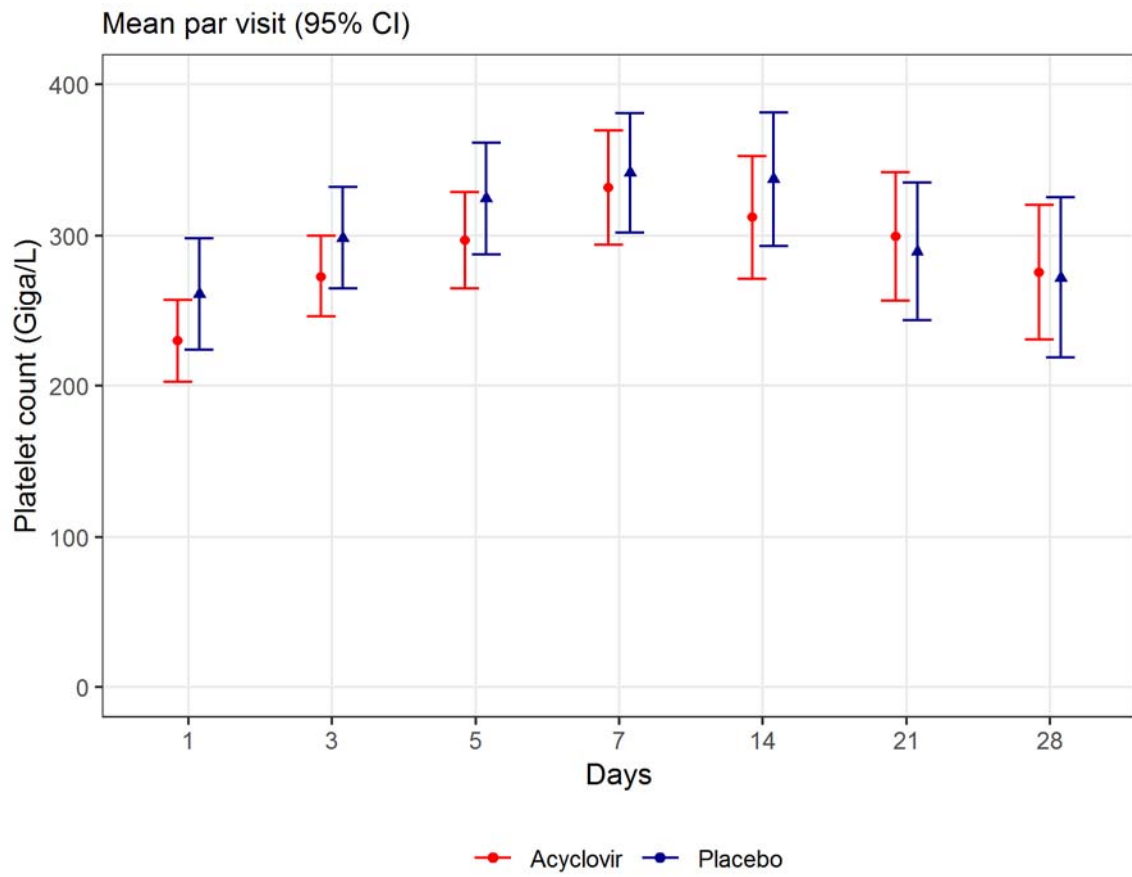

## eReferences

1. Weinberg PF, Matthay MA, Webster RO, Roskos KV, Goldstein IM, Murray JF. Biologically active products of complement and acute lung injury in patients with the sepsis syndrome. *Am Rev Respir Dis* 1984;130(5):791–796.
2. Luyt C-E, Chastre J, Fagon J-Y. Value of the clinical pulmonary infection score for the identification and management of ventilator-associated pneumonia. *Intensive Care Med* 2004;30(5):844–852.
3. Vincent JL, Moreno R, Takala J, et al. The SOFA (Sepsis-related Organ Failure Assessment) score to describe organ dysfunction/failure. On behalf of the Working Group on Sepsis-Related Problems of the European Society of Intensive Care Medicine. *Intensive Care Med* 1996;22(7):707–710.
