# Supplementary material
Source: PubMed Central journal article supplement (PMC6990840)
Supplement: jamainternmed-180-263-s003.pdf [file jamainternmed-180-263-s003.pdf]

# Data Sharing Statement

Luyt. Acyclovir for Mechanically Ventilated Patients With Herpes Simplex Virus Oropharyngeal Reactivation. *JAMA Intern Med*. Published December 16, 2019. 10.1001/jamainternmed.2019.5713

## Data

**Data available:** Yes

**Data types:** Deidentified participant data

**How to access data:** charles-[edouard.luyt@aphp.fr](mailto:edouard.luyt@aphp.fr)

**When available:** With publication

## Supporting Documents

**Document types:** Statistical/analytic code, Informed consent form

**How to access documents:** charles-[edouard.luyt@aphp.fr](mailto:edouard.luyt@aphp.fr)

**When available:** With publication

## Additional Information

**Who can access the data:** researchers whose proposed use of the data have been approved by the principal investigator

**Types of analyses:** for any purpose

**Mechanisms of data availability:** with a signed data access agreement
